# Supplementary material
Source: PubMed Central journal article supplement (PMC4949085)
Supplement: NIHMS781301-supplement-supplement_1.pdf [file NIHMS781301-supplement-supplement_1.pdf]

**Supplementary Material**

Table 3

*Multiple Regression Analyses Predicting AUC<sub>1</sub> by SSS and EBCA Including Covariates.*

|                       | AUC <sub>1</sub> |             |          |
|-----------------------|------------------|-------------|----------|
|                       | <i>B</i>         | <i>SE B</i> | <i>t</i> |
| Age                   | -.99             | .37         | -2.64**  |
| Gender                | -12.04           | 4.57        | -2.64**  |
| Education             | -.10             | .95         | -.10     |
| Subjective Health     | -.99             | 2.58        | -.39     |
| BMI                   | -.21             | .44         | -.47     |
| Cognition             | .18              | .18         | 1.02     |
| Time of Protocol      | 8.04             | 6.33        | 1.27     |
| Hours Since Meal      | -5.97            | 6.29        | -.95     |
| SSS                   | 7.22             | 4.21        | 1.72     |
| EBCA                  | 13.39            | 7.06        | 1.90     |
| SSS*EBCA              | -2.00            | .98         | -2.04*   |
| <i>R</i> <sup>2</sup> |                  |             | .07*     |
| $\Delta R^2$          |                  |             | .01*     |

*Note.* \* $p < .05$ , \*\* $p < .01$ , \*\*\* $p < .001$
